# Supplementary material for: Anti-Aging Effect of the Ketone Metabolite β-Hydroxybutyrate in Drosophila Intestinal Stem Cells
Source: PubMed Central journal article supplement (PMC7278929; doi:10.3390/ijms21103497), 2020-05-15
Supplement: ijms-21-03497-s001.pdf [file ijms-21-03497-s001.pdf]

**Figure S1.**  $\beta$ -HB inhibits age- and oxidative stress-related centrosome amplification in midgut ISCs. (A) Guts from 10-day-old wild type flies (a–b''), 45-day-old wild type flies (c–d''), and 10-day-old *Cat<sup>tn1</sup>* mutant flies (e–f''), without (a–a'', c–c'', e–e'') or with (b–b'', d–d'', f–f'') 2 mM  $\beta$ -HB feeding for seven days, were stained with anti- $\gamma$ -tubulin (red), anti-PH3 (green), and DAPI (blue). Ten-day-old wild type flies, without (g–g'') or with (h–h'') 2 mM  $\beta$ -HB feeding for 6 days, were treated with 10 mM PQ in standard media for 20 h, after which their guts were stained with anti- $\gamma$ -tubulin (red), anti-PH3 (green), and DAPI (blue). a', b', c', d', e', f', g', and h' indicate enlarged PH3 stained images. a'', b'', c'', d'', e'', f'', g'', and h'' indicate enlarged  $\gamma$ -tubulin stained images. Original magnification is 400 $\times$ . (B) The number of PH3-positive cells was counted in whole guts from 10-day-old wild type, 45-day-old wild type, 10-day-old *Cat<sup>tn1</sup>* mutant, and 10-day-old PQ-treated wild type flies, with or without  $\beta$ -HB feeding for seven days. N represents the number of observed guts, and n is the number of observed PH3-positive cells. n.s. indicates not significant ( $p > 0.05$ ). (C) The frequency of supernumerary centrosomes ( $>2$ ) per mitotic ISC in 10-day-old wild type, 45-day-old wild type, 10-day-old *Cat<sup>tn1</sup>* mutant, and 10-day-old PQ-treated wild type flies with or without  $\beta$ -HB feeding for seven days. The centrosome numbers were counted in mitotic ISCs (PH3-positive cells) in the midgut. n.s. indicates not significant ( $p > 0.05$ ). (D) The frequency of mitotic ISCs with supernumerary centrosomes per gut in 10-day-old wild type, 45-day-old wild type, 10-day-old *Cat<sup>tn1</sup>* mutant, and 10-day-old PQ-treated wild type flies with or without  $\beta$ -HB feeding for seven days. The error bar represents standard error. p-values were calculated using Student's *t*-test. n.s. indicates not significant ( $p > 0.05$ ).
